# Supplementary material for: Recent Progress in the Development of Advanced Functionalized Electrodes for Oxygen Evolution Reaction: An Overview
Source: MDPI journal article supplement (doi:10.3390/ma14164420), 2021-08-06
Supplement: s1 [file s1]

# Recent Progress in the Development of Advanced Functionalized Electrodes for Oxygen Evolution Reaction: An Overview

Tse-Wei Chen <sup>1</sup>, Palraj Kalimuthu <sup>2</sup>, Ganesan Anushya <sup>3</sup>, Shen-Ming Chen <sup>4,\*</sup>, Vinitha Mariyappan <sup>4</sup> and Rasu Ramachandran <sup>5,\*</sup>

<sup>1</sup> Department of Materials, Imperial College London, London SW7 2AZ, UK; t.chen19@imperial.ac.uk

<sup>2</sup> School of Chemistry and Molecular Biosciences, University of Queensland, Brisbane 4072, Australia; p.kalimuthu@uq.edu.au;

<sup>3</sup> Department of Physics, S.A.V. Sahaya Thai Arts and Science (Women) College, Sahayam Nagar, Kumarpuram Road, Vadakkankulam, Tirunelveli-627116, India; anushya@savsahayathaicollege.com

<sup>4</sup> Electroanalysis and Bioelectrochemistry Lab, Department of Chemical Engineering and Biotechnology, National Taipei University of Technology, No.1, Section 3, Chung-Hsiao East Road, Taipei 106, Taiwan; vinithavicky80@gmail.com

<sup>5</sup> Department of Chemistry, The Madura College, Vidya Nagar, Madurai-625011, India

\* Correspondence: smchen@ntut.edu.tw (S.-M.C.); ramachandran@maduracollege.edu.in (R.R.)

**Table S1.** Summary of OER electrocatalytic activities of the reported various types of advanced electrodecatalysts.

| Synthesis route | Catalysts                                   | Overpotential (mV) | Tafel slope (mV dec <sup>-1</sup> ) | Current density (mA cm <sup>-2</sup> ) | Medium (M)                          | Ref. |
|-----------------|---------------------------------------------|--------------------|-------------------------------------|----------------------------------------|-------------------------------------|------|
| Electrochemical | (P-PbO <sub>2</sub> )-MnO <sub>2</sub>      | ~139               | 196                                 | 50                                     | 1.63 H <sub>2</sub> SO <sub>4</sub> | [1]  |
| Electrochemical | Mesoporous Ni film                          | 463                | 126                                 | 10                                     | 6 KOH                               | [2]  |
| Pyrolysis       | Ir-based catalyst                           | 243                | 92                                  | 1.40                                   | 0.1 HClO <sub>4</sub>               | [3]  |
| Self-assembled  | 2D-NiO/CeO <sub>2</sub>                     | 212                | 60                                  | 10                                     | 1 KOH                               | [4]  |
| Hydrothermal    | Trimetallic NiFeCr                          | 225                | 69                                  | 25                                     | 1 KOH                               | [5]  |
| Hydrothermal    | Ni@NiCo <sub>2</sub> O <sub>4</sub>         | 270                | 67                                  | 10                                     | 1 KOH                               | [6]  |
| Self-assembled  | N-Co <sub>3</sub> O <sub>4</sub>            | 1180               | 29.8                                | 10                                     | 1 KOH                               | [7]  |
| Hydrothermal    | Mesoporous NiCo <sub>2</sub> O <sub>4</sub> | ~350               | 43                                  | 10                                     | 1 KOH                               | [8]  |
| Hydrothermal    | AuNP/CoMoN <sub>x</sub>                     | 166                | 46                                  | 10                                     | 1 KOH                               | [9]  |
| Hydrothermal    | Carbon-enriched                             | 207                | 97                                  | 10                                     | 1 KOH                               | [10] |

## References

- Li, Y.; Jiang, L.; Liu, F.; Li, J.; Liu, Y.; Novel phosphorous doped PbO<sub>2</sub>-MnO<sub>2</sub>bicontinuous electrodes for oxygen evolution reaction. *RSC Adv.* **2014**, *4*, 24020-24028.
- Farmani, A.L.; Nasirpour, F.; Boosting hydrogen and oxygen evolution reactions on electrodeposited nickel electrodes via simultaneous mesoporosity, magnetohydrodynamics and high gradient magnetic force. *J. Mater. Chem. A* **2020**, *8*, 24782-24799.
- Ko, J.S.; Johnson, J.K.; Johnson, P.I.; Xia, Z.; Developing oxygen and chlorine evolution reaction in sea water using iridium-based electrocatalysts. *Chem. Cat. Chem.* **2020**, *12*, 4526-4532.
- Zhang, Y.; Ye, F.; Li, W.; Self-assembled two-dimensional NiO/CeO<sub>2</sub> heterostructure rich in oxygen vacancies as efficient bifunctionalelectrocatalyst for alkaline hydrogen evolution and oxygen evolution. *Chem. Eur. J.* **2020**, *27*, 3766-3771.
- Yang, Y.; Dang, L.; Shearer, M.J.; Sheng, H.; Li, W.; Chen, J.; Xiao, P.; Zhang, Y.; Hamers, R.J.; Jin, S.; Highly active trimetallic NiFeCr layered double hydroxide electrocatalysts for oxygen evolution reaction. *Adv. Energy. Mater.* **2018**, 1703189.
- Wang, L.; Gu, C.; Ge, X.; Zhang, J.; Zhu, H.; Tu, J.; Decorating NiCo<sub>2</sub>O<sub>4</sub> shell on a hollow Ni nanorod array core for water splitting with enhanced electrocatalytic performance. *Chem. Nano. Mater.* **2017**, doi: 10.1002/cnma.201700291.
- Li, X.; Wei, J.; Li, Q.; Zheng, S.; Xu, Y.; Du, P.; Chen, C.; Zhao, J.; Xue, H.; Xu, Q.; Pang, H.; Nitrogen-doped cobalt oxide nanostructures derived from cobalt-alanine complexes for high performance oxygen evolution reactions. *Adv. Funct. Mater.* **2018**,

1800886.

8. Broicher, C.; Zeng, F.; Artz, J.; Hartmann, H.; Besmehn, A.; Palkovits, S.; Palkovits, R.; Facile synthesis of mesoporous nickel cobalt oxide for OER-insights into intrinsic electrocatalytic activity. *Chem. Cat. Chem.* **2018**, doi: 10.1002/cctc.201801316.
9. Yao, R.Q.; Shi, H.; Wan, W.B.; Wen, Z.; Lang, X.Y.; Jiang, Q.; Flexible Co-Mo-N/Au electrodes with a hierarchical nanoporous architecture as high efficient electrocatalysts for oxygen evolution reaction, *Adv. Mater.* **2020**, 1907214.
10. Surendran, S.; Shanmugapriya, S.; Lee, Y.S.; Sim, U.; Kalaiselvan, R.; Carbon-enriched cobalt phosphide with assorted nanostructure as a multifunctional electrode for energy conversion and storage devices, *Chemistry Select.* **2018**, 3, 12303-12313.
